# Supplementary material for: Branched chain α‐ketoacid dehydrogenase kinase 111–130, a T cell epitope that induces both autoimmune myocarditis and hepatitis in A/J mice
Source: PubMed Central journal article supplement (PMC5691315; doi:10.1002/iid3.177), 2017-06-09
Supplement: IID3-5-421-s001.pdf [file IID3-5-421-s001.pdf]

## 10. Supporting Information

### 10.1. Figure S1: Evaluation of cardiac abnormalities in A/J mice immunized with BCKD<sub>k</sub>

**111-130.** Groups of mice were immunized with or without BCKD<sub>k</sub> 111-130; after 20 days, animals were euthanized, hearts were weighed, and the heart weight (wt) to body wt ratios were then determined. Mean  $\pm$  SEM values representing heart and body wts and heart wt/body wt ratios for a group of mice are shown (n=3/group). The *p* values were determined using Student's *t*-test (\**P* < 0.05 and \*\**P* < 0.001).

### 10.2. Figure S2: BCKD<sub>k</sub> peptides that induce T cell responses, but not myocarditis in

**immunized animals.** Groups of A/J mice were immunized with the indicated peptides in CFA, and after three weeks, animals were euthanized to prepare LNCs from the draining lymph nodes. Cells were stimulated with the immunizing peptides or RNase 43-56 (control) for two days, and after pulsing with tritiated-thymidine for 16 hours, proliferative responses were measured as cpm. Mean  $\pm$  SEM values obtained from two individual experiments, each representing 2 to 3 mice, are shown. The *p* values were determined using Student's *t*-test (\**P* < 0.05 and \*\**P* < 0.001 between indicated doses).

### 10.3. Figure S3: Proliferative responses of lymphocytes from naive animals to BCKD<sub>k</sub>

**peptides.** Lymphocytes containing a mixture of LNCs and splenocytes obtained from naive A/J mice were stimulated with the indicated peptides or RNase 43-56 (control) for two days, and after pulsing with tritiated-thymidine for 16 hours, proliferative responses were measured as cpm. Mean  $\pm$  SEM values obtained from five mice are shown.

### 10.4. Figure S4: Cytokine responses induced by BCKD<sub>k</sub> 71-90 and BCKD<sub>k</sub> 141-160. LNCs

were prepared from animals that received CFA/peptide emulsions twice, and the cells were stimulated with or without immunizing peptides or RNase 43-56 (control). Supernatants

collected on day 3 poststimulation were analyzed using cytokine-capture beads and detection antibodies based on cytometric bead array analysis. Left panel **A**): BCKD<sub>k</sub> 71-90; right panel **B**): BCKD<sub>k</sub> 141-160. Mean  $\pm$  SEM values obtained from three to four individual experiments are shown. The *p* values were determined using Student's *t*-test (\**P* < 0.05, \*\**P* < 0.005 and \*\*\**P* < 0.0005). ND; not detectable.

**Table S1: List of overlapping peptides of BCKD<sub>k</sub> used to determine their immunogenicity**

| Peptide                   | Sequence               |
|---------------------------|------------------------|
| BCKD <sub>k</sub> 1-20    | STSATDTHHVELARERSKTV   |
| BCKD <sub>k</sub> 11-30   | ELARERSKTVTSFYNQSAID   |
| BCKD <sub>k</sub> 21-40   | TSFYNQSAIDVAAEKPSVRL   |
| BCKD <sub>k</sub> 31-50   | VAAEKPSVRLTPTMMLYSGR   |
| BCKD <sub>k</sub> 41-60   | TPTMMLYSGRSQDGSHELLKS  |
| BCKD <sub>k</sub> 51-70   | SQDGSHELLKSGRYLQQELPV  |
| BCKD <sub>k</sub> 61-80   | GRYLQQELPVRIAHRIKGFR   |
| BCKD <sub>k</sub> 71-90   | RIAHRIKGFRSLPFIIGCNP   |
| BCKD <sub>k</sub> 81-100  | SLPFIIGCNPTILHVHELYI   |
| BCKD <sub>k</sub> 91-110  | TILHVHELYIRAFQKLTDFP   |
| BCKD <sub>k</sub> 101-120 | RAFQKLTDFPPIKDQADEAQ   |
| BCKD <sub>k</sub> 111-130 | PIKDQADEAQYCQLVRQLLD   |
| BCKD <sub>k</sub> 121-140 | YCQLVRQLLDDHKDVVTLA    |
| BCKD <sub>k</sub> 131-150 | DHKDVVTLAEGLRERKHI     |
| BCKD <sub>k</sub> 141-160 | EGLRESRKHIQDEKLVRYFL   |
| BCKD <sub>k</sub> 151-170 | QDEKLVRYFLDKTLTSRLGI   |
| BCKD <sub>k</sub> 161-180 | DKTLTSRLGIRMLATHHLAL   |
| BCKD <sub>k</sub> 171-190 | RMLATHHLALHEDKPDFVGI   |
| BCKD <sub>k</sub> 181-200 | HEDKPDFVGIICTRLSPKKI   |
| BCKD <sub>k</sub> 191-210 | ICTRLSPKKIIEKWVDFARR   |
| BCKD <sub>k</sub> 201-220 | IEKWVDFARRLCEHKYGNAP   |
| BCKD <sub>k</sub> 211-230 | LCEHKYGNAPRVRINGHVAA   |
| BCKD <sub>k</sub> 221-240 | RVRINGHVAARFPFIPMPLD   |
| BCKD <sub>k</sub> 231-250 | RFPFIPMPLDYILPELLKNA   |
| BCKD <sub>k</sub> 241-260 | YILPELLKNAMRATMESHLD   |
| BCKD <sub>k</sub> 251-270 | MRATMESHLDTPYNVPDVVI   |
| BCKD <sub>k</sub> 261-280 | TPYNVPDVVITIANNIDILI   |
| BCKD <sub>k</sub> 271-290 | TIANNIDILIIRISDRGGGI   |
| BCKD <sub>k</sub> 281-300 | IRISDRGGGIAHKDLDRVMD   |
| BCKD <sub>k</sub> 291-310 | AHKDLDRVMDYHFTTAEAST   |
| BCKD <sub>k</sub> 301-320 | YHFTTAEASTQDPRINPLFG   |
| BCKD <sub>k</sub> 311-330 | QDPRINPLFGHLDMHSGGQS   |
| BCKD <sub>k</sub> 321-340 | HLDMHSGGQSGPMHGFGL     |
| BCKD <sub>k</sub> 331-350 | GPMHGFGLPTSRA YAEYL    |
| BCKD <sub>k</sub> 341-360 | PTSRA YAEYLGGS LQLQSLQ |
| BCKD <sub>k</sub> 351-370 | GGSLQLQSLQGIGTDVYLRL   |
| BCKD <sub>k</sub> 361-380 | GIGTDVYLRLRHIDGreesF   |

**Table S2: T cell responses induced by peptides of BCKD<sub>k</sub>**

| Pools | Peptides                        | Fold difference† |             |
|-------|---------------------------------|------------------|-------------|
|       |                                 | 10 (µg/µl)       | 100 (µg/µl) |
| I     | RNase 43-56 (control)           | 0.93             | 0.99        |
|       | BCKD <sub>k</sub> 1-20          | 0.97             | 1.18        |
|       | BCKD <sub>k</sub> 11-30         | 0.86             | 1.16        |
|       | BCKD <sub>k</sub> 21-40         | 0.82             | 1.35        |
|       | <b>BCKD<sub>k</sub> 31-50</b>   | <b>1.16</b>      | <b>1.34</b> |
|       | BCKD <sub>k</sub> 41-60         | 1.06             | 1.21        |
| II    | RNase 43-56 (control)           | 1.04             | 1.08        |
|       | <b>BCKD<sub>k</sub> 51-70</b>   | <b>1.28</b>      | <b>1.47</b> |
|       | <b>BCKD<sub>k</sub> 61-80</b>   | <b>1.46</b>      | <b>1.80</b> |
|       | <b>BCKD<sub>k</sub> 71-90</b>   | <b>1.49</b>      | <b>2.55</b> |
|       | BCKD <sub>k</sub> 81-100        | 1.08             | 1.81        |
|       | <b>BCKD<sub>k</sub> 91-110</b>  | <b>1.86</b>      | <b>2.05</b> |
| III   | RNase 43-56 (control)           | 1.04             | 1.06        |
|       | <b>BCKD<sub>k</sub> 101-120</b> | <b>1.21</b>      | <b>1.46</b> |
|       | <b>BCKD<sub>k</sub> 111-130</b> | <b>1.21</b>      | <b>1.75</b> |
|       | <b>BCKD<sub>k</sub> 121-140</b> | <b>1.41</b>      | <b>1.84</b> |
|       | BCKD <sub>k</sub> 131-150       | 1.08             | 1.53        |
|       | <b>BCKD<sub>k</sub> 141-160</b> | <b>1.58</b>      | <b>1.66</b> |
| IV    | RNase 43-56 (control)           | 1.05             | 1.12        |
|       | BCKD <sub>k</sub> 151-170       | 1.08             | 1.46        |
|       | <b>BCKD<sub>k</sub> 161-180</b> | <b>1.24</b>      | <b>1.88</b> |
|       | BCKD <sub>k</sub> 171-190       | 0.98             | 1.12        |
|       | BCKD <sub>k</sub> 181-200       | 1.03             | 1.22        |
|       | BCKD <sub>k</sub> 191-210       | 1.14             | 1.40        |
| V     | RNase 43-56 (control)           | 0.92             | 0.97        |
|       | <b>BCKD<sub>k</sub> 201-220</b> | <b>1.18</b>      | <b>1.17</b> |
|       | <b>BCKD<sub>k</sub> 211-230</b> | <b>1.17</b>      | <b>1.22</b> |
|       | <b>BCKD<sub>k</sub> 221-240</b> | <b>1.13</b>      | <b>1.26</b> |
|       | <b>BCKD<sub>k</sub> 231-250</b> | <b>1.37</b>      | <b>1.64</b> |
|       | <b>BCKD<sub>k</sub> 241-260</b> | <b>1.11</b>      | <b>1.28</b> |
| VI    | RNase 43-56 (control)           | 0.88             | 1.10        |
|       | BCKD <sub>k</sub> 251-270       | 1.12             | 1.23        |
|       | <b>BCKD<sub>k</sub> 261-280</b> | <b>1.51</b>      | <b>1.41</b> |
|       | <b>BCKD<sub>k</sub> 271-290</b> | <b>1.36</b>      | <b>1.74</b> |
|       | BCKD <sub>k</sub> 281-300       | 1.16             | 1.18        |
| VII   | RNase 43-56 (control)           | 1.16             | 1.24        |
|       | <b>BCKD<sub>k</sub> 291-310</b> | <b>2.04</b>      | <b>3.02</b> |
|       | <b>BCKD<sub>k</sub> 301-320</b> | <b>1.89</b>      | <b>2.21</b> |
|       | BCKD <sub>k</sub> 311-330       | 1.05             | 1.46        |
|       | <b>BCKD<sub>k</sub> 321-340</b> | <b>1.49</b>      | <b>2.15</b> |
| VIII  | RNase 43-56 (control)           | 1.00             | 1.25        |
|       | <b>BCKD<sub>k</sub> 331-350</b> | <b>1.63</b>      | <b>1.65</b> |
|       | <b>BCKD<sub>k</sub> 341-360</b> | <b>1.51</b>      | <b>1.57</b> |
|       | <b>BCKD<sub>k</sub> 351-370</b> | <b>1.39</b>      | <b>1.59</b> |
|       | BCKD <sub>k</sub> 361-380       | 1.21             | 1.25        |

†Represents fold difference in T cell proliferative responses induced with BCKD<sub>k</sub> peptides in relation to medium controls. Significant differences for BCKD<sub>k</sub> peptides vs. RNase 43-56 are bolded ( $P \leq 0.005$ ).

**Table S3: Echocardiographic assessment of cardiac abnormalities in mice immunized with BCKD<sub>k</sub> 111-130**

| Parameters                                         | Naïve         | BCKD <sub>k</sub> 111-130 |
|----------------------------------------------------|---------------|---------------------------|
| Interventricular septal thickness at diastole (mm) | 0.70 ± 0.06   | 0.93 ± 0.03*              |
| LV internal diameter at diastole (mm)              | 3.50 ± 0.03   | 3.20 ± 0.06               |
| End diastolic volume (μl)                          | 110.00 ± 3.33 | 86.60 ± 3.33              |
| End systolic volume (μl)                           | 30.00 ± 10.00 | 20.00 ± 0.00              |

Data represent mean ± SEM with \**P* < 0.05 vs. naïve group.

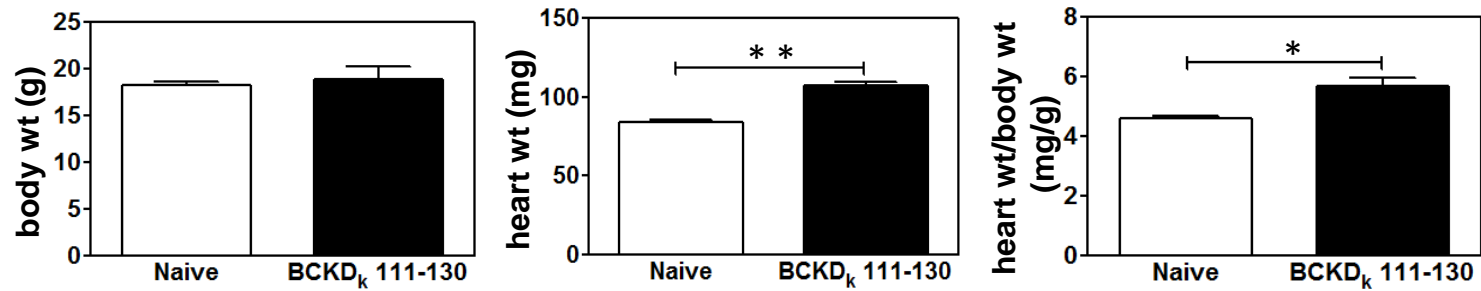

**Figure S1: Evaluation of cardiac abnormalities in A/J mice immunized with BCKD<sub>k</sub> 111-130**

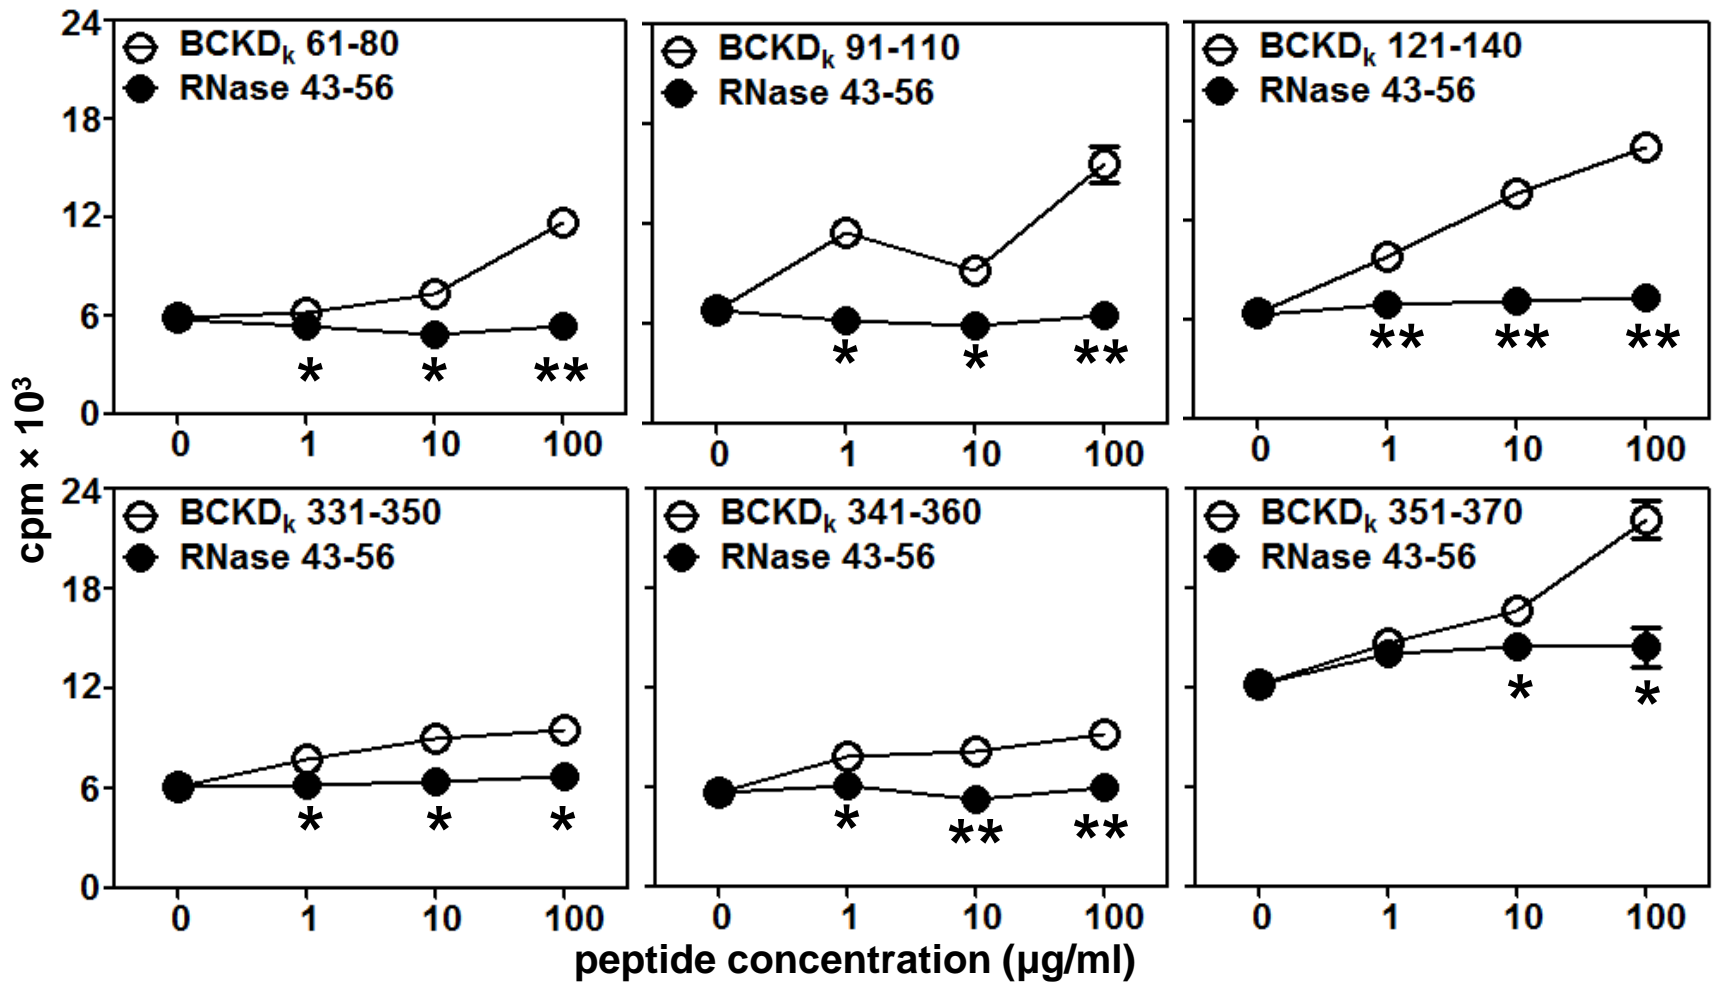

**Figure S2: BCKD<sub>k</sub> peptides that induce T cell responses, but not myocarditis in immunized animals**

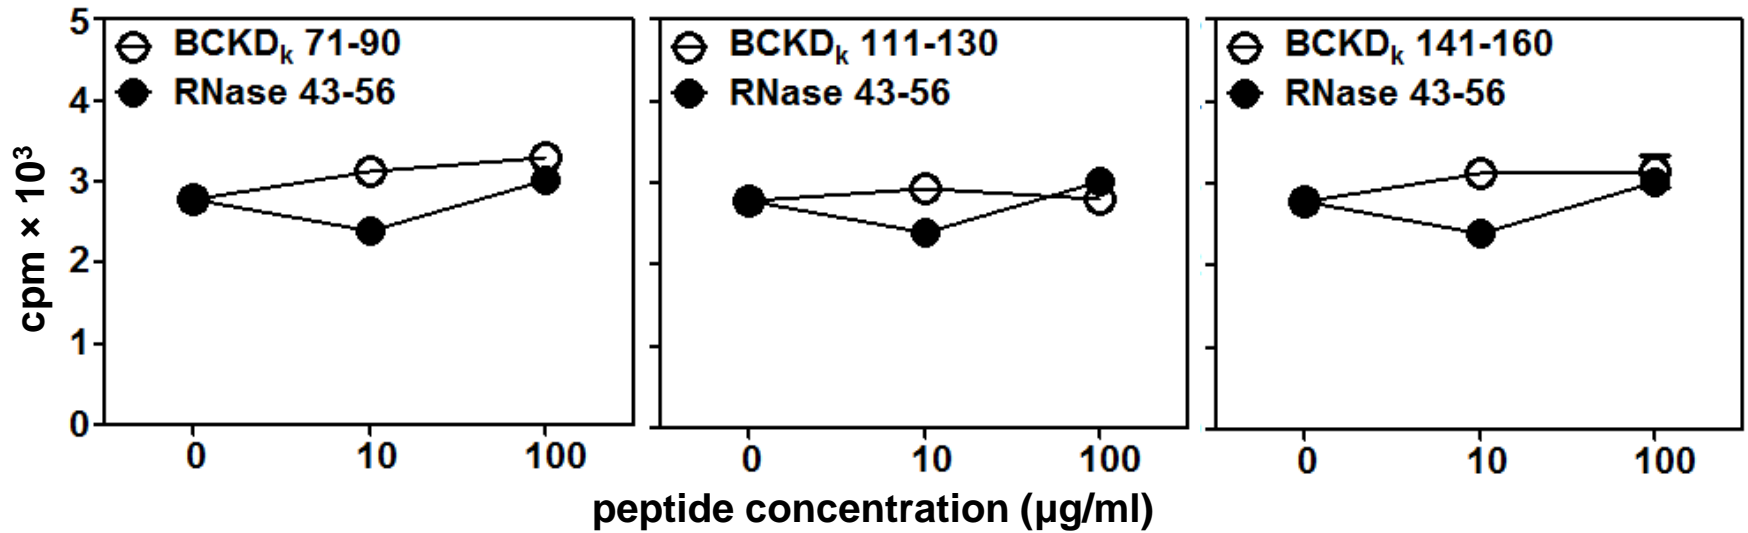

**Figure S3: Proliferative responses of lymphocytes from naïve animals to BCKD<sub>k</sub> peptides**
